# Supplementary material for: Novel and Stable Dual-Color IL-6 and IL-10 Reporters Derived from RAW 264.7 for Anti-Inflammation Screening of Natural Products
Source: MDPI journal article supplement (doi:10.3390/ijms20184620), 2019-09-18
Supplement: s1 [file s1]

## Supplementary Information

### The Novel Stable RAW 264.7 Derived Dual-Colour IL-6 and IL-10 Reporters for Anti-Inflammation Screening of Natural Products

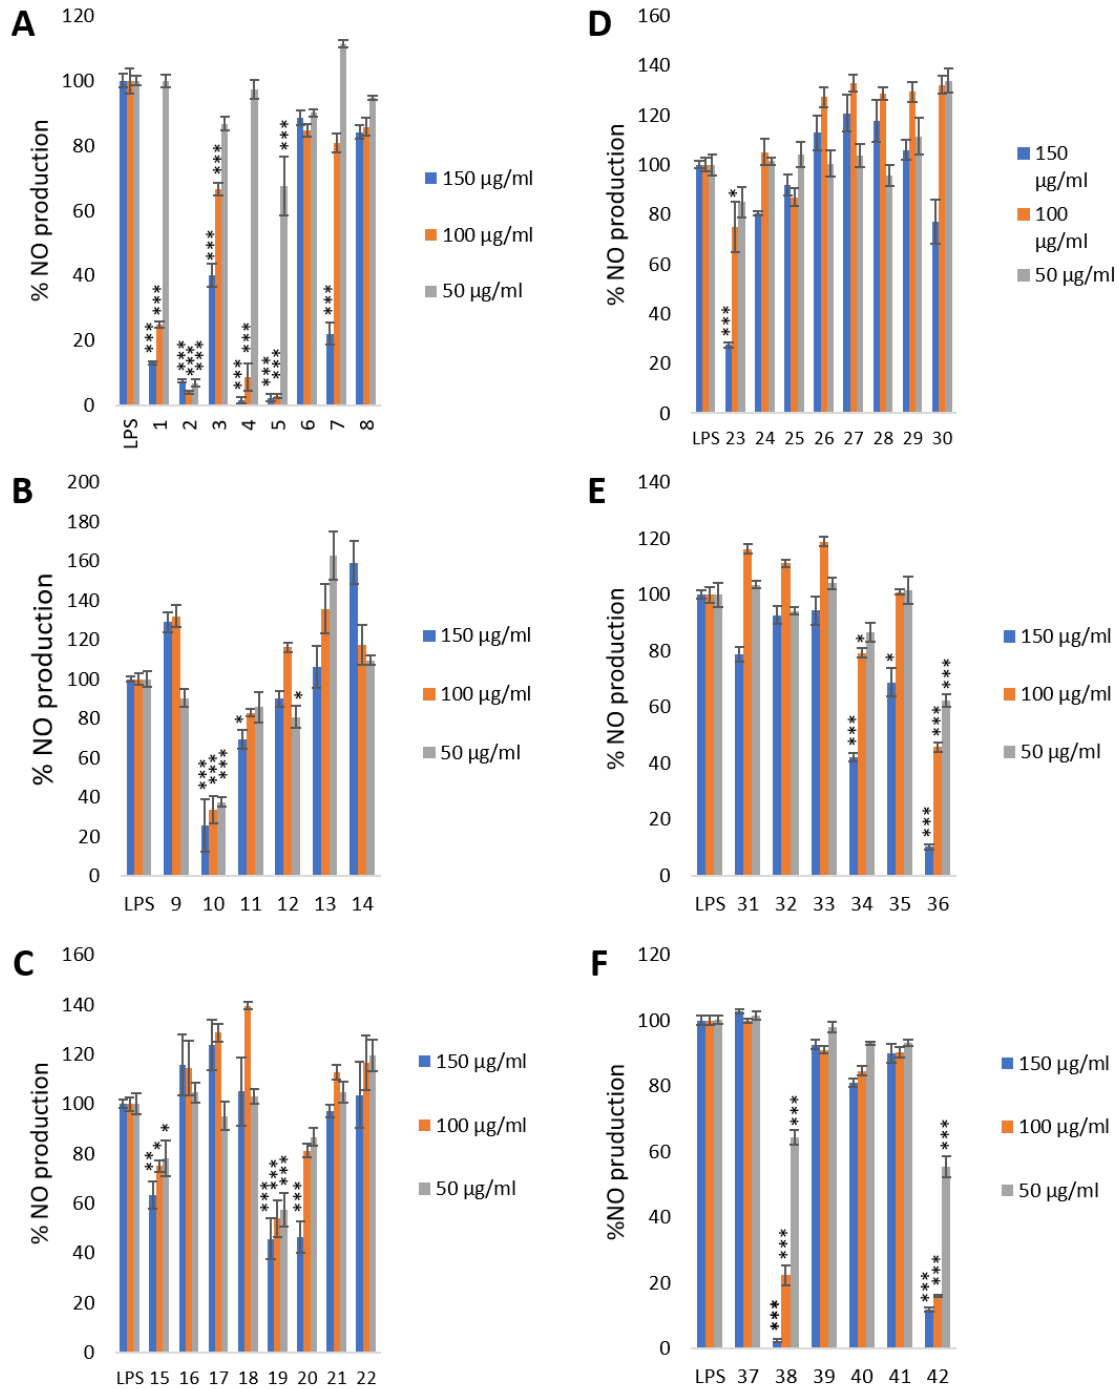

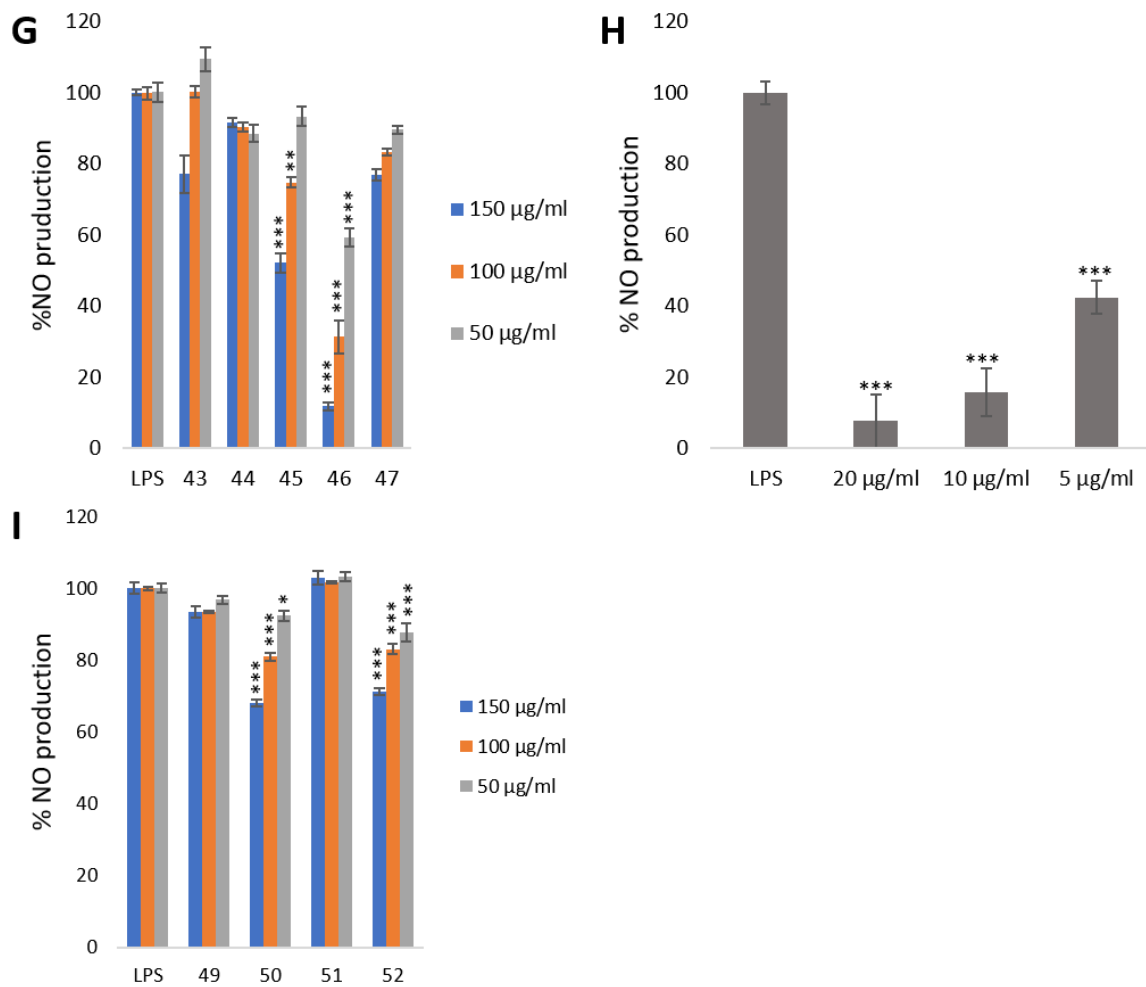

**Figure S1.** The effect of crude extracts (Table 1) on the inhibition of NO production in LPS treated RAW 264.7 cells. H: Greater Galangal (48) Statistical analyses were performed by means of ANOVA followed by Dunnett's test. Each value represents the mean  $\pm$  SD ( $n = 4$ ). \*  $p < 0.05$ , \*\*  $p < 0.01$ , \*\*\*  $p < 0.001$  versus the LPS group.

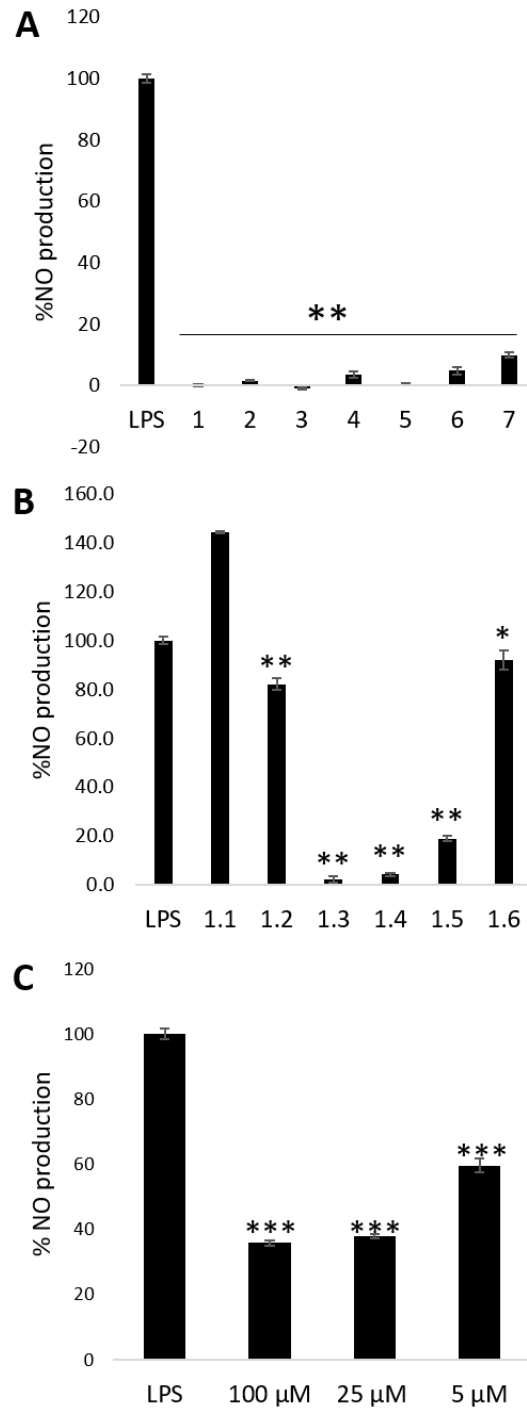

**Figure S2.** The effect of fractions from Greater Galangal extract on the inhibition of NO production in LPS treated RAW 264.7 cells. **A:** fraction from crude extract **B:** fraction from HPLC **C:** Statistical analyses were performed by means of ANOVA followed by Dunnett's test. Each value represents the mean  $\pm$  SD ( $n = 4$ ). \*  $p < 0.05$ , \*\*  $p < 0.001$  versus the LPS group.

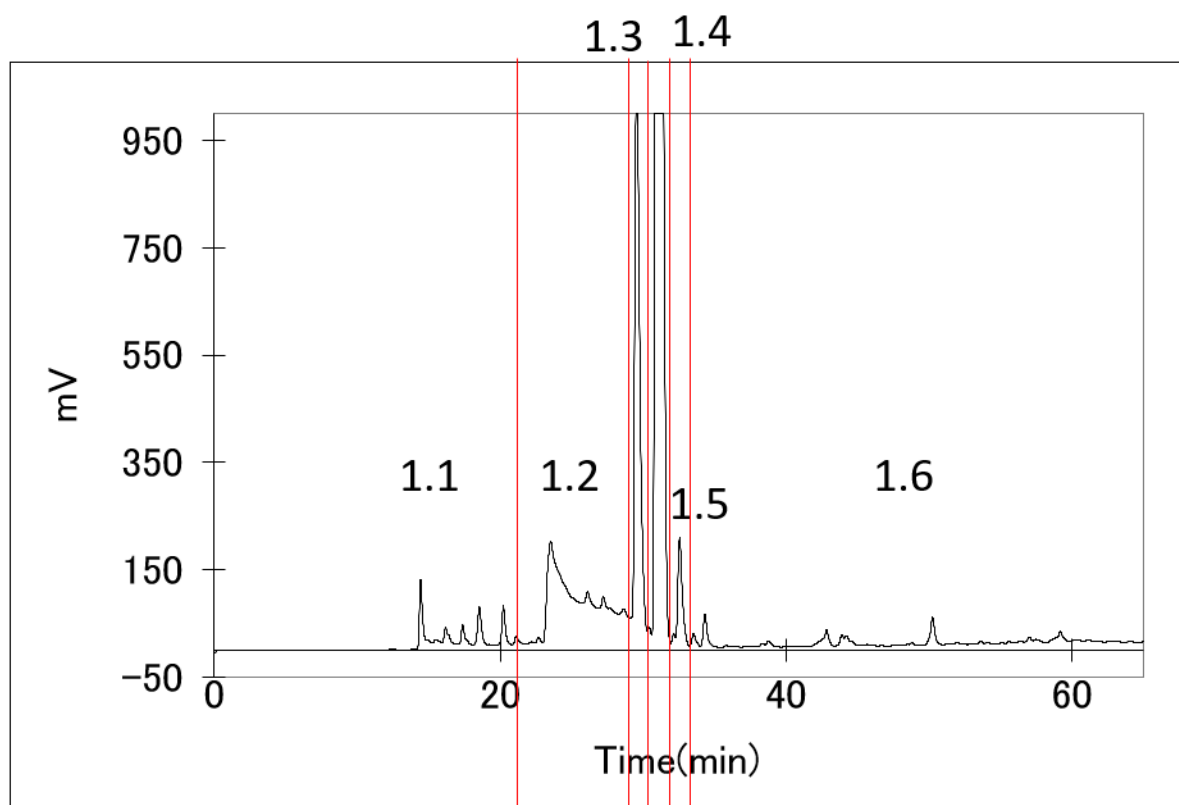

**Figure S3.** The fractions of crude extract from Greater Galangal by HPLC.

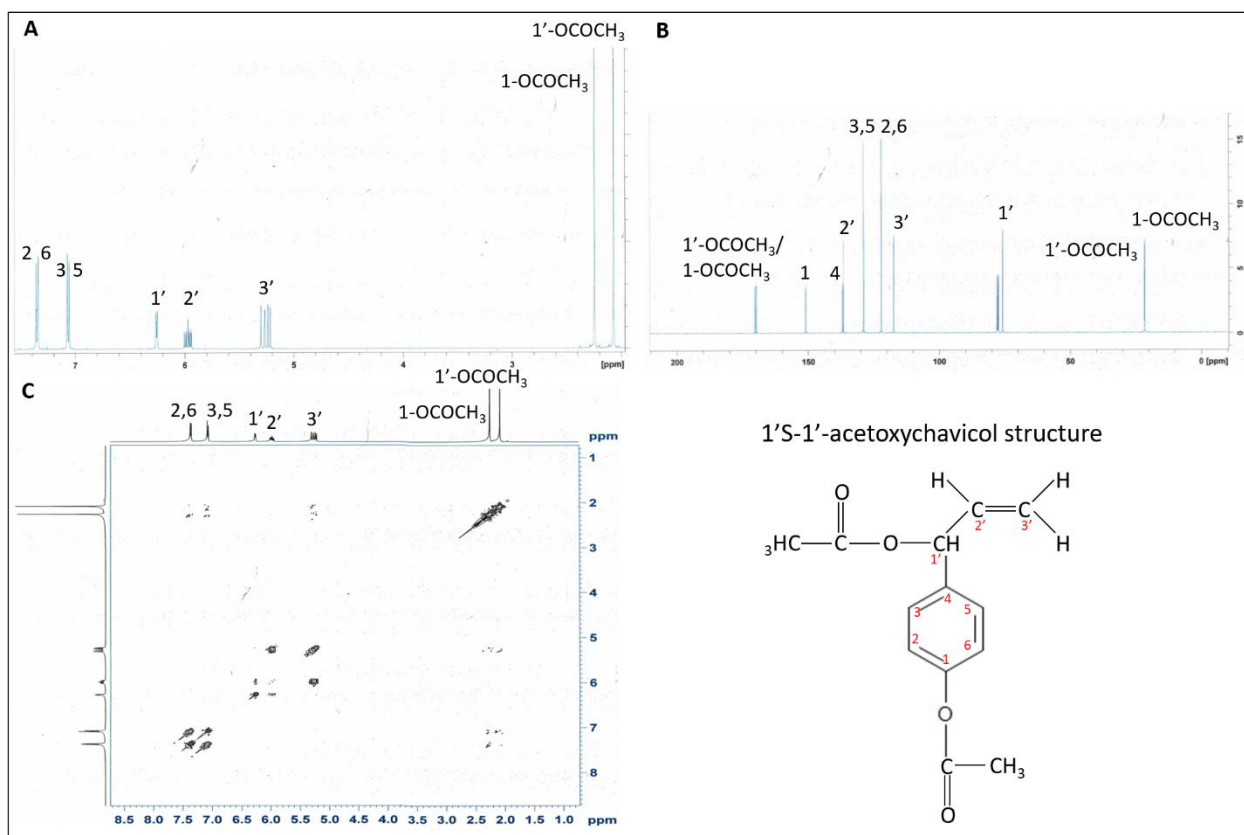

**Figure S4.** The one-dimensional  $^1\text{H}$  and  $^{13}\text{C}$  and two-dimensional COSY spectra of linoleic acid from (A, B and C respectively).
